# Supplementary material
Source: PubMed Central journal article supplement (PMC1276710)
Supplement: 7600827s1.pdf [file 7600827s1.pdf]

**A**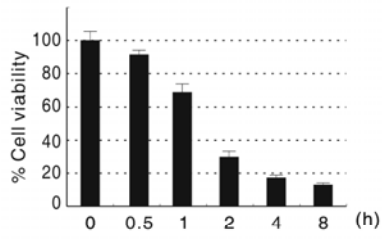**B**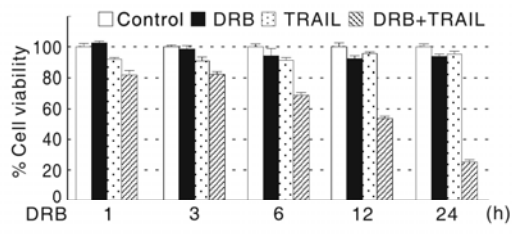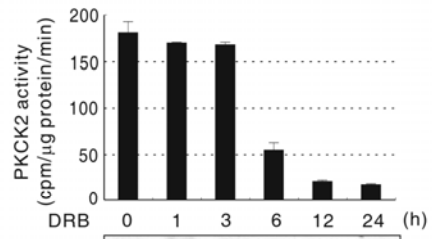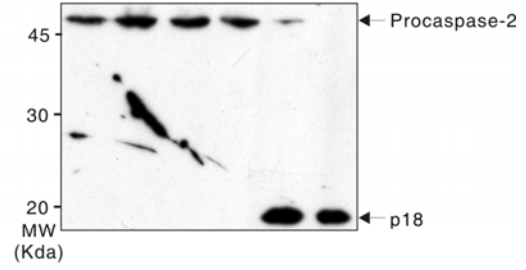**C**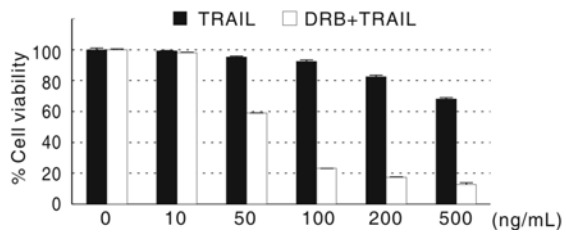

Supplementary Figure S1. Killing activity of TRAIL. **(A)** Cell viability was evaluated by the MTT assay using TRAIL-sensitive TE2 cells incubated with TRAIL (100 ng/mL) at the indicated time points. The data are expressed as mean  $\pm$  SD for triplicate, and similar results were obtained from two independent experiments. **(B)** Cell viability was evaluated by the MTT assay using HCE4 cells incubated with DRB for the indicated time points and then subsequently treated with TRAIL for 2 h. The data are expressed as mean  $\pm$  SD for triplicate, and similar results were obtained from two independent experiments (left). PKCK2 activity assay was performed using HCE4 cells treated with DRB for the indicated time points. The data are expressed as mean  $\pm$  SD for triplicate, and similar results were obtained from two independent experiments (right top). Western blot immunostaining was performed using each extract of HCE4 cells treated with DRB for the indicated time points (right bottom) **(C)** Cell viability was evaluated by the MTT assay using TRAIL-resistant HCE4 cells incubated with DRB for 24 h and then subsequently treated with the indicated concentrations of TRAIL for 2 h. The data are expressed as mean  $\pm$  SD for triplicate, and similar results were obtained from two independent experiments.
