# Supplementary material
Source: PubMed Central journal article supplement (PMC1276710)
Supplement: 7600827s2.pdf [file 7600827s2.pdf]

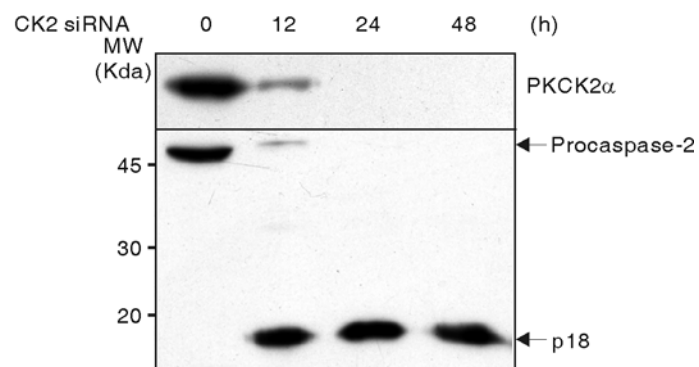

Supplementary Figure S2. PKCK2 silencing and procaspase-2 activation. TRAIL-resistant HCE4 cells were transfected with PKCK2 $\alpha$  SMART Pool<sup>®</sup> siRNAs for up to 48 h. Lysates were prepared at each time points after transfection (0, 12, 24, and 48 h) and Western blot analysis was performed using indicated Abs.
